# Supplementary material
Source: MDPI journal article supplement (https://www.mdpi.com/2076-3263/8/10/379)
Supplement: s1 [file s1]

# Supplementary Materials: Where, What, When, and Why Is Bottom Mapping Needed? An on-line Application to Set Priorities Using Expert Opinion

Matthew S. Kendall , Ken Buja, Charles Menza and Tim Battista

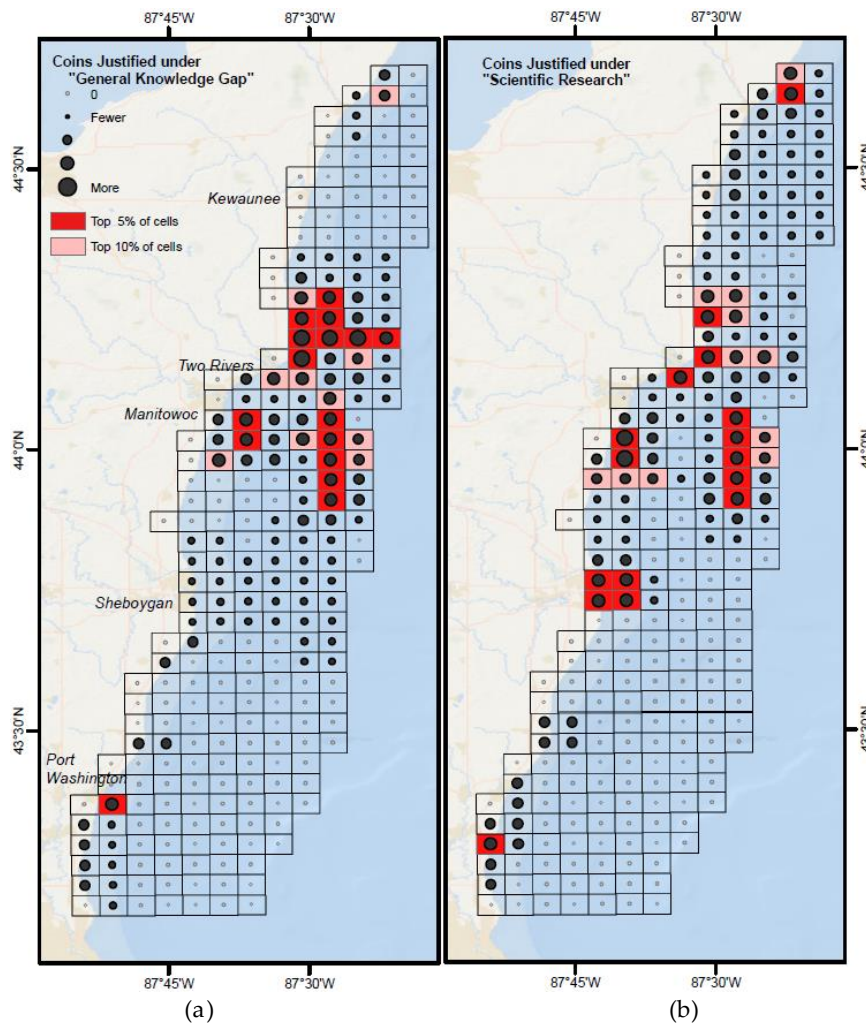

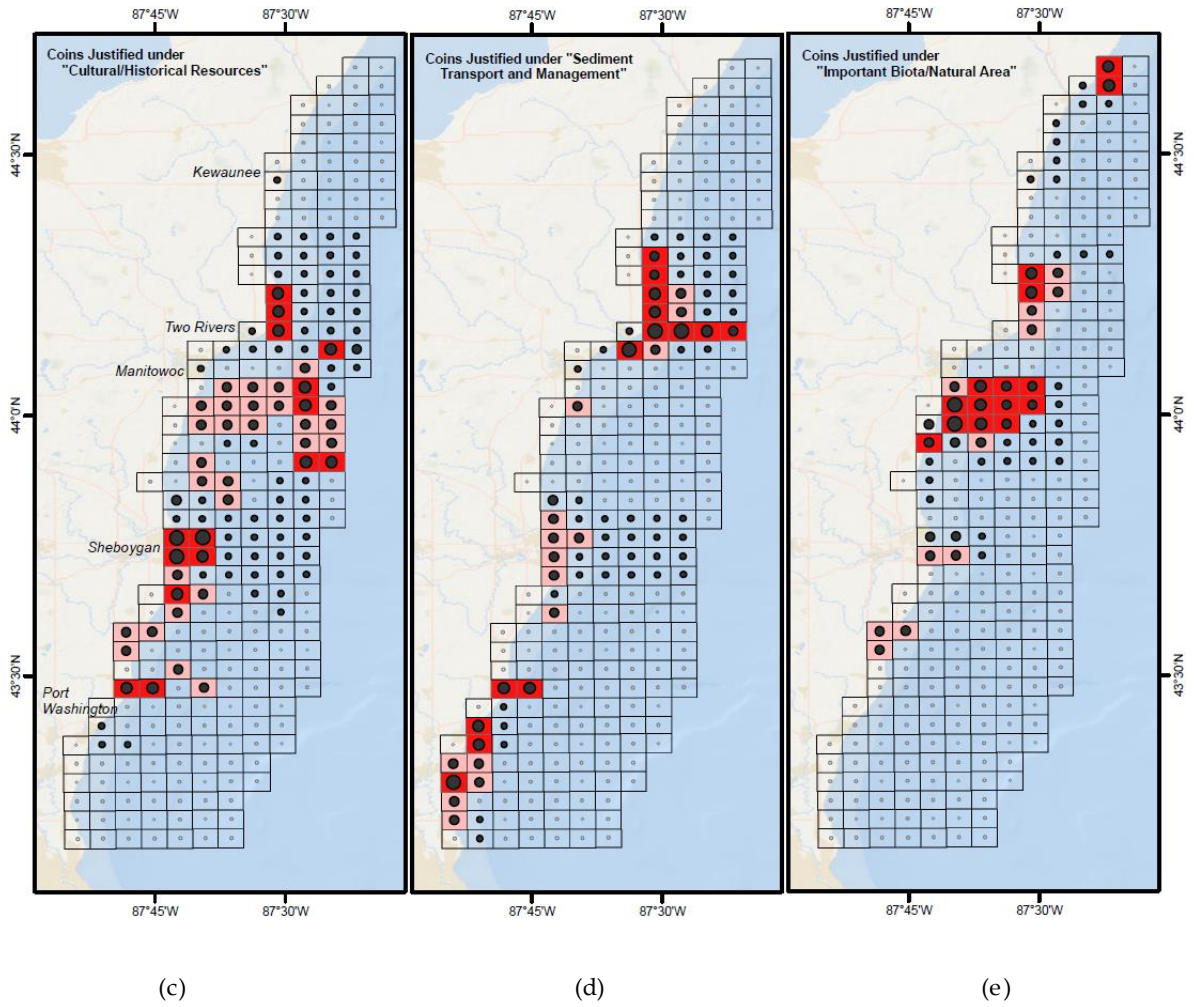

**Figure S1.** Sum of all coins in each cell that were Justified on the basis of: (a) "General knowledge gap"; (b) "Scientific research"; (c) "Cultural/historical resources"; (d) "Sediment movement and management"; and (e) "Important biota/natural area".

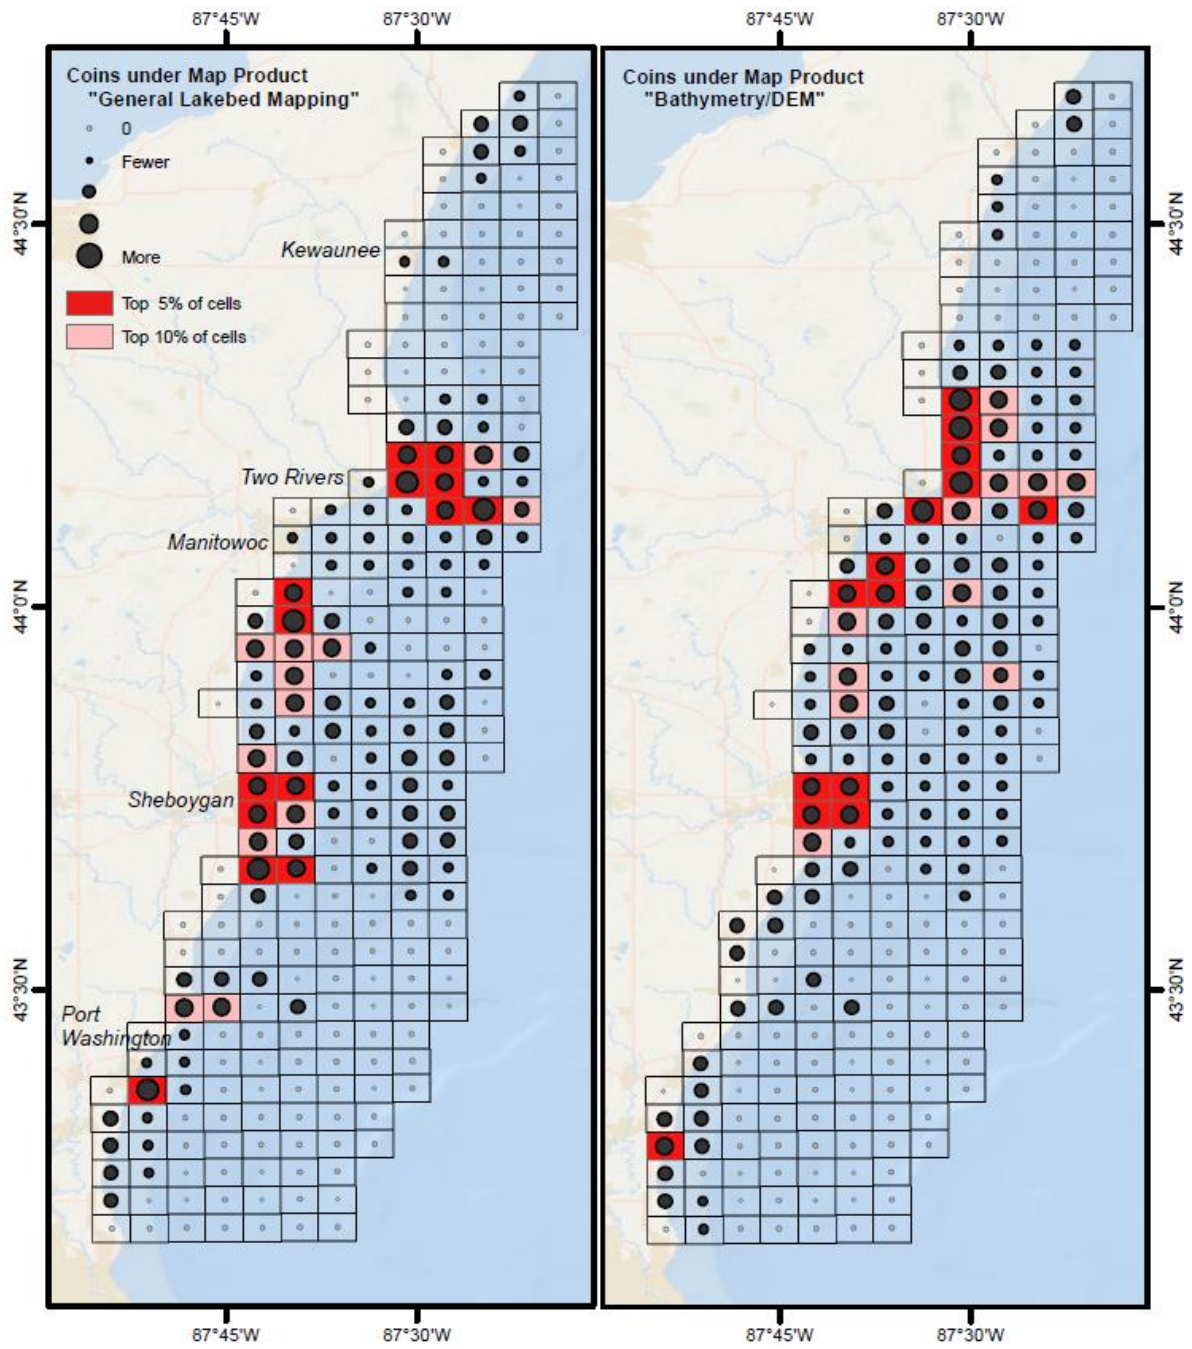

(a)

(b)

**Figure S2.** Sum of all coins in each cell associated with the Map Product: (a) “General Lakebed mapping”; and (b) “Bathymetry/Digital Elevation Model”.

**Table S1.** List of respondents and their affiliations.

| <b>Respondent</b>          | <b>Affiliation</b>                                       |
|----------------------------|----------------------------------------------------------|
| <b>Harvey Bootsma</b>      | University of Wisconsin- Milwaukee                       |
| <b>Aaron Brault</b>        | Sheboygan County Government                              |
| <b>Chris Bresky</b>        | Adler Planetarium, Chicago                               |
| <b>Todd Brieby</b>         | Wisconsin Coastal Management Program                     |
| <b>P.J. Creviere</b>       | Independent                                              |
| <b>Peter Esselman</b>      | United States Geological Survey                          |
| <b>William Fetzer</b>      | Wisc. Department of Natural Resources                    |
| <b>Russ Green</b>          | NOAA/Office of National Marine Sanctuaries               |
| <b>John Janssen</b>        | University of Wisconsin- Milwaukee                       |
| <b>John Jensen</b>         | University of West Florida                               |
| <b>Brandon Krumwiede</b>   | NOAA/Office for Coastal Management                       |
| <b>David Mickelson</b>     | U. Wisconsin- Department of Geoscience                   |
| <b>Elmo Rawling III</b>    | Wisc. Geological and Natural History Survey              |
| <b>Catherine Riseng</b>    | University of Michigan                                   |
| <b>Ed Rutherford</b>       | NOAA/Great Lakes Env. Res. Laboratory                    |
| <b>Titus Seilheimer</b>    | U. Wisconsin, Sea Grant at UW - Manitowoc                |
| <b>Ethan J. Theuerkauf</b> | U. Illinois at Urbana-Champaign, State Geological Survey |
| <b>Tamara Thomsen</b>      | Wisconsin Historical Society                             |
| <b>Ted Treska</b>          | US Fish and Wildlife Service                             |
| <b>Philip Willink</b>      | Shedd Aquarium, Chicago                                  |
| <b>Caitlyn Zant</b>        | Wisconsin Historical Society                             |
| <b>Luke Zoet</b>           | U. Wisconsin, Department of Geosciences                  |
